# Supplementary material for: A rapidly responsive photochromic hydrogel with high mechanical strength for ink-free printing
Source: Royal Society of Chemistry journal article supplement (doi:10.1039/c8tc02276c), 2018-01-01
Supplement: c8tc02276c1.pdf [file c8tc02276c1.pdf]

# Electronic Supporting Information

## **High mechanical strength and rapidly responsive photochromic hydrogel for ink-free printing**

Yongqi Yang, Lin Guan, Haicheng Jiang, Lijie Duan\*, Guanghui Gao

Polymeric and Soft Materials Laboratory, School of Chemical Engineering, and  
Advanced Institute of Materials Science, Changchun University of Technology,  
Changchun, 130012, P. R. China.

E-mail: [duanlijie@ccut.edu.cn](mailto:duanlijie@ccut.edu.cn)

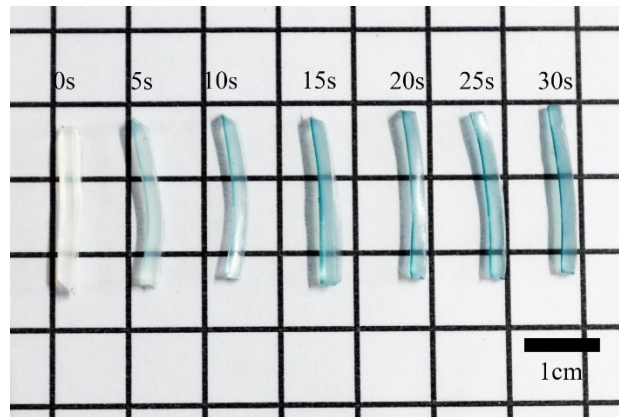

Figure S1. Photograph of cross section of PAAm/Gelatin/Mo7 hydrogels after exposure to UV light for different time.

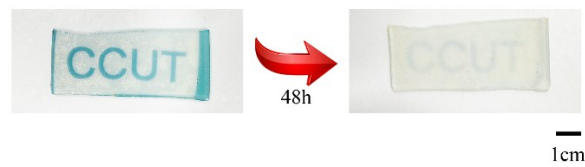

Figure S2. The fading process of PAAm/Gelatin/Mo7 hydrogel at room temperature .
